# Supplementary material for: COVID-19 progression and convalescence in common variable immunodeficiency patients shows incomplete adaptive responses and persistent inflammasome activation
Source: Research Square preprint supplement (doi:10.21203/rs.3.rs-2246352/v1), 2022-11-14
Supplement: Supplementary file 1 [file 07b36dfaa95df0d44c83326f.xlsx]

## Sheet: CellQC
Supplementary Table 2. Cell quality control and Azimuth classification of the single-cell data from the CVID cohort
	CVID1			CVID2			CVID3			CVID4			CVID5
	Baseline	Progression	Convalescense	Baseline	Progression	Convalescense	Baseline	Progression	Convalescense	Baseline	Progression	Convalescense	Baseline	Progression	Convalescense	genotypic Doublet
Default Nb cells	13624	14972	31935	9980	12644	4769	2467	4909	4189	5160	4780	4533	2608	1561	1819	14416
scrublet doublets	161	65	771	135	100	79	24	73	30	70	2	73	108	15	6	1827
high mitochondria	29	101	87	9	23	103	7	31	39	27	10	90	31	10	3	51
Unfiltered cells	13434	14806	31077	9836	12521	4587	2436	4805	4120	5066	4768	4370	2469	1536	1810	0
No VDJ genes	9224	10452	23443	8467	8843	2603	1778	1953	1860	3340	2459	2446	1961	1245	1409	0
having TCR	3624	4220	7309	878	3175	1819	655	2848	2259	1510	2125	1794	493	287	394	0
single clonotype	1742	626	1524	425	1170	656	495	1490	1424	702	377	549	455	243	350	0
expanded clonotype	1882	3594	5785	453	2005	1163	160	1358	835	808	1748	1245	38	44	44	0
having BCR	586	134	325	491	503	165	3	4	1	216	184	130	15	4	7	0
single clonotype	534	108	310	468	447	141	3	4	1	207	160	123	12	4	7	0
expanded clonotype	52	26	15	23	56	24	0	0	0	9	24	7	3	0	0	0

## Sheet: AzimuthClassification
CVID only	T Naive CD4	TCM CD4	TEM CD4	T Effector CD4	T Naive CD8	TEM CD8	TE CD8	NKT-like	NK CD16	NK CD56	Tcell Cycling	Cytotoxic T cell	Treg	gdT	dnT	MAIT	Bcell naive	Bcell US-mem	Bcell S-mem	Plasma Bcells	Classical monocytes	Monocytes mito	Monocytes IFN	Monocytes IL1b	Intermediate monocytes	Non-classical monocytes	cDCs	ASDC	pDC	hSC	Platelets	Erythrocytes
CD4_Naive	64	40	0	0	4	0	0	0	0	0	0	0	0	0	0	0	0	0	0	0	0	0	0	0	0	0	0	0	0	0	0	0
CD4_TCM	370	851	95	2019	10	21	8	134	0	0	94	12	41	1	3	3	1	0	0	0	0	0	0	0	0	0	0	0	0	0	0	0
CD4_TEM	11	33	9	444	1	30	1	17	1	0	0	3	4	3	0	18	0	0	0	0	0	0	0	0	0	0	0	0	0	0	0	0
CD4_CTL	1	3	0	80	0	0	17	87	1	0	1	380	0	13	0	0	0	0	0	0	0	0	0	0	0	0	0	0	0	0	0	0
CD8_Naive	3	8	0	12	123	4	130	3	0	1	154	1	0	3	1	0	0	0	0	0	0	0	0	0	0	0	0	0	0	0	0	0
CD8_TEM	10	17	15	102	0	1370	5946	3674	184	18	107	1118	1	190	1	4	1	0	0	0	0	0	0	0	0	0	0	0	1	0	0	0
CD8_TCM	51	55	47	5	10	84	19	17	0	0	1	0	0	0	0	0	0	0	0	0	0	0	0	0	0	0	0	0	0	0	0	0
NK	1	0	0	0	0	4	7	518	452	166	2	1	0	17	0	0	0	0	0	0	0	0	0	0	0	0	0	0	2	0	0	0
NK_CD56bright	0	0	0	0	0	0	0	1	0	190	0	0	0	0	0	0	0	0	0	0	0	0	0	0	0	0	0	0	0	0	0	0
ILC	1	14	4	1	0	2	0	20	0	31	1	0	0	0	0	0	1	0	0	0	1	0	0	0	0	0	0	0	1	0	0	0
CD8_Proliferating	0	0	0	0	0	0	3	3	1	0	414	0	0	0	0	0	0	0	0	0	0	0	0	0	0	0	0	0	0	0	0	0
CD4_Proliferating	0	0	0	0	0	0	0	0	0	0	178	0	0	0	0	0	0	0	0	0	0	0	0	0	0	0	0	0	0	0	0	0
NK_Proliferating	0	0	0	0	0	0	1	3	6	2	596	3	0	0	0	0	0	0	0	0	0	0	0	0	0	0	0	0	0	0	0	0
Treg	7	57	0	34	0	0	0	7	0	0	0	1	66	0	0	0	0	0	0	0	0	0	0	0	0	0	0	0	0	0	0	0
gdT	0	0	0	3	0	2	0	39	4	1	0	1	0	73	0	1	0	0	0	0	0	0	0	0	0	0	0	0	0	0	0	0
dnT	3	0	0	3	0	10	0	6	0	0	3	0	1	0	49	0	0	0	0	0	0	0	0	0	0	0	0	0	0	0	0	0
MAIT	0	1	0	7	0	1	1	3	0	0	0	1	0	9	0	20	0	0	0	0	0	0	0	0	0	0	0	0	0	0	0	0
B_naive	0	0	0	0	0	0	0	0	0	0	0	0	0	0	0	0	557	32	5	0	0	0	0	0	0	0	0	0	0	0	0	0
B_intermediate	0	0	0	0	0	0	0	0	0	0	0	0	0	0	0	0	151	215	15	0	0	0	0	0	0	0	0	0	0	0	0	0
CD14_Mono	0	0	0	0	0	0	0	0	0	0	1	0	0	0	0	0	0	0	0	0	3326	194	400	290	972	33	23	0	0	0	0	1
CD16_Mono	0	0	0	0	0	0	0	0	0	0	0	0	0	0	0	0	0	0	0	0	19	0	2	7	260	976	1	0	0	0	0	1
cDC1	0	0	0	0	0	0	0	0	0	0	0	0	0	0	0	0	0	0	0	0	0	0	0	0	0	0	5	0	0	0	0	0
cDC2	0	0	0	0	0	0	0	0	0	0	0	0	0	0	0	0	0	0	0	0	24	0	0	4	13	0	140	0	0	0	0	0
ASDC	0	0	0	0	0	0	0	0	0	0	0	0	0	0	0	0	0	0	0	0	0	0	0	0	0	0	0	8	0	0	0	0
pDC	0	0	0	0	0	0	0	0	0	0	1	0	0	0	0	0	1	0	0	0	0	0	0	0	0	0	0	0	178	0	0	0
HSPC	0	0	0	0	0	0	0	0	0	0	0	0	0	0	0	0	1	0	0	0	1	0	0	0	0	0	0	0	1	57	0	0
Platelet	0	0	0	0	0	0	0	0	0	0	0	0	0	0	0	0	33	2	0	0	8	0	0	0	0	0	0	0	0	0	99	0
Eryth	3	3	0	10	0	8	15	50	11	6	7	7	0	4	0	0	17	2	1	0	810	14	50	34	60	15	0	0	3	0	6	1
