# Supplementary material for: COVID-19 progression and convalescence in common variable immunodeficiency patients shows incomplete adaptive responses and persistent inflammasome activation
Source: Research Square preprint supplement (doi:10.21203/rs.3.rs-2246352/v1), 2022-11-14
Supplement: Supplementary file 2 [file 71faec530e96926e4740f0cf.xlsx]

## Sheet: Hoja 1
Supplementary Table 1. Clinical and epidemiological information of donors from the CVID cohort and the non-CVID control cohort.
sampleID	PatientID	Age	Sex	CoVID-19 severity	Disease stage	Sampling day (Days after symptoms onset)	SARS-CoV-2 (based on PCR)	Outcome	CVID EUROclass	Baseline IgM and IgA levels	Post-infection IgG and IgA anti-spike response	Comorbidities	PID-related mutational status	COVID-19-related medication and anti-microbials
CVID1_BL	CVID1	60	M	NA	baseline	no COVID-19	negative	discharged	smB- 21lo	IgM: <0,17 / IgA: <0,06	NA	CVID, hypertension		Control (no COVID-19)
CVID1_PG	CVID1	60	M	mild	progression	27	positive	discharged	smB- 21lo	NA	NA	CVID, hypertension		HQC, Anakinra, Ivermectin
CVID1_CV	CVID1	60	M	mild	convalescence	69	negative	discharged	smB- 21lo	NA	IgG:no / IgA:no	CVID, hypertension		HQC, Anakinra, Ivermectin
CVID2_BL	CVID2	59	F	NA	baseline	no COVID-19	negative	discharged	smB- 21norm	IgM: <0,17 / IgA: <0,06	NA	CVID, oligoarthritis, bronchiectasis, cryptic cirrhosis, status post malignant solid tumor	TNFRSF13B c. p.A181E	Control (no COVID-19)
CVID2_PG	CVID2	59	F	mild	progression	64	positive	discharged	smB- 21norm	NA	NA	CVID, oligoarthritis, bronchiectasis, cryptic cirrhosis, status post malignant solid tumor	TNFRSF13B c. p.A181E	none
CVID2_CV	CVID2	59	F	mild	convalescence	77	negative	discharged	smB- 21norm	NA	IgG:no / IgA:no	CVID, oligoarthritis, bronchiectasis, cryptic cirrhosis, status post malignant solid tumor	TNFRSF13B c. p.A181E	none
CVID3_BL	CVID3	60	M	NA	baseline	no COVID-19	negative	discharged	B-	IgM: <0,17 / IgA: <0,06	NA	CVID, autoimmune cytopenia, interstitial nephritis, chronic airway disease, Interstitial lung disease, hypertension		Control (no COVID-19)
CVID3_PG	CVID3	60	M	mild	progression	34	positive	discharged	B-	NA	NA	CVID, autoimmune cytopenia, interstitial nephritis, chronic airway disease, Interstitial lung disease, hypertension		none
CVID3_CV	CVID3	60	M	mild	convalescence	136	negative	discharged	B-	NA	IgG:no / IgA:no	CVID, autoimmune cytopenia, interstitial nephritis, chronic airway disease, Interstitial lung disease, hypertension		Convalescent plasma therapy
CVID4_BL	CVID4	70	M	NA	baseline	no COVID-19	negative	discharged	smB- 21lo	IgM: <0,17 / IgA: <0,06	NA	CVID, psoriasis, chronic airway disease, hypertension		Control (no COVID-19)
CVID4_PG	CVID4	70	M	mild	progression	5	positive	discharged	smB- 21lo	NA	NA	CVID, psoriasis, chronic airway disease, hypertension		none
CVID4_CV	CVID4	70	M	mild	convalescence	103	negative	discharged	smB- 21lo	NA	IgG:yes / IgA:no	CVID, psoriasis, chronic airway disease, hypertension		Convalescent plasma therapy, remdesivir
CVID5_BL	CVID5	54	F	NA	baseline	no COVID-19	negative	discharged	B-	IgM: <0,17 / IgA: <0,06	NA	CVID, interstitial lung disease, autoimmune cytopenia, chronic airway disease, nodular regenerative hyperplasia		Control (no COVID-19)
CVID5_PG	CVID5	54	F	mild	progression	15	positive	discharged	B-	NA	NA	CVID, interstitial lung disease, autoimmune cytopenia, chronic airway disease, nodular regenerative hyperplasia		none
CVID5_CV	CVID5	54	F	mild	convalescence	112	negative	discharged	B-	NA	IgG:no / IgA:no	CVID, interstitial lung disease, autoimmune cytopenia, chronic airway disease, nodular regenerative hyperplasia		Convalescent plasma therapy
S-HC008	P-HC008	44	M	NA	control	no COVID-19	negative	control	NA	NA	NA	control	NA	Control (no COVID-19)
S-HC010	P-HC010	58	M	NA	control	no COVID-19	negative	control	NA	NA	NA	control	NA	Control (no COVID-19)
S-HC013	P-HC013	45	M	NA	control	no COVID-19	negative	control	NA	NA	NA	control	NA	Control (no COVID-19)
S-HC015	P-HC015	69	F	NA	control	no COVID-19	negative	control	NA	NA	NA	control	NA	Control (no COVID-19)
S-HC017	P-HC017	71	F	NA	control	no COVID-19	negative	control	NA	NA	NA	control	NA	Control (no COVID-19)
S-HC014	P-HC014	37	M	NA	control	no COVID-19	negative	control	NA	NA	NA	control	NA	Control (no COVID-19)
S-M044-1	P-M044	55	F	mild	progression	6	positive	discharged	NA	NA	NA	asthma	NA	Interferon alpha 2 b, Lopinavir/ ritonavir, antibiotics
S-M046	P-M046	60	F	mild	progression	7	positive	discharged	NA	NA	NA	asthma	NA	Interferon alpha 2 b, Lopinavir/ ritonavir, steroids, Human immunoglobulin, antibiotics
S-M047	P-M047	37	M	mild	progression	7	positive	discharged	NA	NA	NA	none	NA	Interferon alpha 2 b, Lopinavir/ ritonavir, Arbidol, ribavirin, steroids, Human immunoglobulin
S-M067	P-M067	48	M	mild	progression	15	positive	discharged	NA	NA	NA	none	NA	none
S-M044-2	P-M044	55	F	mild	convalescence	19	negative	discharged	NA	NA	NA	asthma	NA	Interferon alpha 2 b, Lopinavir/ ritonavir, antibiotics
S-M050	P-M050	50	M	mild	convalescence	74	negative	discharged	NA	NA	NA	unknown	NA	Arbidol, Interferon
S-M051	P-M051	70	F	mild	convalescence	66	negative	discharged	NA	NA	NA	hypertension	NA	Oseltamivir
S-M052	P-M052	49	M	mild	convalescence	74	negative	discharged	NA	NA	NA	hypertension	NA	Oseltamivir
S-M055	P-M055	58	M	mild	convalescence	64	negative	discharged	NA	NA	NA	coronary heart disease	NA	Oseltamivir
S-S054	P-S054	40	M	severe	progression	4	positive	discharged	NA	NA	NA	diabetes	NA	Interferon alpha 2 b, Lopinavir/ ritonavir, steroids, Human immunoglobulin, antibiotics, antifungal, MSC(mesenchymal stem cell)
S-S057	P-S057	78	M	severe	progression	10	positive	discharged	NA	NA	NA	hypertension, diabetes, prostate cancer	NA	Interferon alpha 2 b, Lopinavir/ ritonavir, steroids, Human immunoglobulin, antibiotics
S-S061	P-S061	54	F	severe	progression	68	positive	discharged	NA	NA	NA	hypertension	NA	Ribavirin
S-S055	P-S055	50	F	severe	progression	15	positive	discharged	NA	NA	NA	cervical spondylosis	NA	Interferon alpha 2 b, Lopinavir/ ritonavir, steroids, Human immunoglobulin, antibiotics
S-S059	P-S059	70	F	severe	progression	24	positive	deceased	NA	NA	NA	hypertension	NA	Arbidol, Ribavirin
S-S062	P-S062	50	M	severe	convalescence	57	negative	discharged	NA	NA	NA	unknown	NA	Oseltamivir, Arbidol, Ribavirin
S-S064	P-S064	74	M	severe	convalescence	77	negative	discharged	NA	NA	NA	hypertension, coronary heart disease	NA	Oseltamivir
S-S065	P-S065	50	F	severe	convalescence	65	negative	discharged	NA	NA	NA	diabetes	NA	Oseltamivir, Ritonavir, Methylprednisolone
S-S067	P-S067	69	F	severe	convalescence	62	negative	discharged	NA	NA	NA	HBV	NA	Oseltamivir
S-S068	P-S068	72	F	severe	convalescence	71	negative	discharged	NA	NA	NA	hypertension, coronary heart disease, diabetes	NA	Oseltamivir
