# Supplementary material for: COVID-19 progression and convalescence in common variable immunodeficiency patients shows incomplete adaptive responses and persistent inflammasome activation
Source: Research Square preprint supplement (doi:10.21203/rs.3.rs-2246352/v1), 2022-11-14
Supplement: Supplementary file 3 [file b2d909c6baf3b966a69bb466.docx]

**SUPPLEMENTARY FIGURE LEGENDS**

**Supplementary Figure 1.** (a) Circle plot representing the expression of selected genes in the B cell compartment that characterize each B cell subset. Circle size indicates the percentage of cells in the subset expressing the gene. Scale indicates the gene expression level. (b) UMAP visualizations of the B cell compartment showing the expression of selected genes that are *bona fide* markers of CD21low B cells. (c) Circle plot representing the expression of selected genes that are *bona fide* markers of CD21low B cells. Circle size indicates the percentage of cells in the subset expressing the gene. Scale indicates the gene expression level. (d) Scheme representing different molecules related to the BCR signaling pathway. (e) Circle plot representing the relative expression of selected inflammatory genes in the naïve B cell compartment. Circle size indicates TPM mean and scale indicates Log2 of the gene expression fold change in progression or convalescence states over baseline. Significance is also indicated by a black (FDR < 0.05) or gray (FDR > 0.05) line. PG (progression), CV (convalescence), M (mild), S (severe).

**Supplementary Figure 2.** (a) Circle plot representing the expression of selected genes in the T and NK cell compartment that characterize each cell subset. Circle size indicates the percentage of cells in the subset expressing the gene. Scale indicates the gene expression level. (b) Circle plot representing the relative expression of cytotoxicity-related genes in several subsets of NK and T cells. Circle size indicates TPM mean and scale indicates Log2 of the gene expression fold change in progression or convalescence states over baseline. Significance is also indicated by a black (FDR < 0.05) or gray (FDR > 0.05) line. PG (progression), CV (convalescence), M (mild), S (severe). (c) Distribution of T cell clonotypes in the CVID cohort along the three stages: baseline (B), progression (P) and convalescence (C) in the different T cell subsets. ‘Prior’ refers to clonotypes that were present at baseline, ‘during’ refers to clonotypes that appear at the progression stage, and ‘post’ refers to clonotypes that appear at the convalescence stage.

**Supplementary Figure 3.** (a) Circle plot representing the expression of selected genes in the myeloid compartment that characterize each cell subset. Circle size indicates the percentage of cells in the subset expressing the gene. Scale indicates the gene expression level. (b) Dot plot representing the relative enrichment of monocytes from COVID-19 non-CVID and COVID-19 CVID in selected GO categories. Dot size indicates the absolute FC. The DEGs used were those from the comparison between baseline and convalescence. (c) Heatmap showing the relative expression of selected inflammasome-related genes. Scale indicates relative gene expression (z-score). Relative gene expression is normalized with respect to the baseline of each dataset (control or CVID). COVID-19 course (baseline, progression or convalescence), COVID-19 severity (mild or severe) and CVID status (CVID or non-CVID) are indicated. (d) Heatmap showing the relative expression of selected anti-inflammatory genes in the classical monocytes compartment. Scale indicates relative gene expression (z-score). Relative gene expression is normalized with respect to the baseline of each dataset (control or CVID). COVID-19 course (baseline, progression or convalescence), COVID-19 severity (mild or severe) and CVID status (CVID or non-CVID) are indicated.
