# Supplementary material for: COVID-19 progression and convalescence in common variable immunodeficiency patients shows incomplete adaptive responses and persistent inflammasome activation
Source: Research Square preprint supplement (doi:10.21203/rs.3.rs-2246352/v1), 2022-11-14
Supplement: Supplementary file 4 [file c60f72e0ba7787a69bcd8189.xlsx]

## Sheet: Celltype representation against
Supplementary Table 3. Cell count per cell type of the single-cell data from the CVID cohort
	baseline								progression								convalescence
	CVID	Non-CVID (Ren)	Non-CVID (Stephenson)	Non-CVID Sum	CVID enrichment	Patientwise mean frequency	Patientwise mean frequency	T-test	CVID	Non-CVID (Ren)	Non-CVID (Ren)	Non-CVID Sum	CVID enrichment	Patientwise mean frequency	Patientwise mean frequency	T-test	CVID	Non-CVID (Ren)	Non-CVID (Ren)	Non-CVID Sum	CVID enrichment	Patientwise mean frequency	Patientwise mean frequency	T-test
						CVID	Non-CVID	log10Pval	Mild	Mild	Severe			CVID	Non-CVID	log10Pval	Mild	Mild	Severe			CVID	Non-CVID	log10Pval
T Naive CD4	174	12060	10547	22607	0.072	0.012396	0.130682	-2.31122	399	634	921	1555	0.651	0.019608	0.042359	-0.6974	454	1027	589	1616	0.656	0.022637	0.028957	-0.301039
TCM CD4	1349	887	8647	9534	1.176	0.102615	0.093959	-0.066267	392	2634	1780	4414	0.26	0.028262	0.08637	-0.946648	344	1438	2385	3823	0.247	0.035391	0.080965	-1.00679
TEM CD4	81	364	10805	11169	0.068	0.003711	0.094118	-1.97764	149	152	122	274	1.122	0.010306	0.00763	-0.254465	105	294	263	557	0.475	0.006628	0.010044	-0.363641
T Effector CD4	1203	986	883	1869	3.716	0.058554	0.011069	-2.87895	1526	304	344	648	2.236	0.071032	0.018822	-1.21877	2556	418	167	585	2.435	0.105474	0.009879	-2.33087
T Naive CD8	100	1647	5043	6690	0.14	0.007929	0.045654	-1.40089	80	469	269	738	0.312	0.004149	0.016036	-1.07614	109	448	534	982	0.299	0.007025	0.017185	-0.607657
TEM CD8	922	3285	3923	7208	1.076	0.050685	0.043512	-0.175379	851	877	1069	1946	0.969	0.037729	0.048485	-0.225329	1202	908	548	1456	1.353	0.053997	0.033771	-0.769251
TE CD8	1861	2320	3791	6111	2.215	0.089732	0.039902	-1.26727	3694	826	1038	1864	2.118	0.150299	0.050325	-1.4895	6647	1473	824	2297	2.224	0.179719	0.051683	-1.38473
NKT-like	3194	641	2307	2948	4.934	0.177496	0.021063	-7.67689	3966	1118	384	1502	2.311	0.160615	0.037326	-2.0789	1849	1652	1588	3240	1.087	0.08109	0.069206	-0.138802
NK CD16	228	5729	10859	16588	0.129	0.014466	0.129933	-2.22371	671	4782	3138	7920	0.249	0.032532	0.175742	-1.26965	378	3164	2185	5349	0.198	0.019092	0.124339	-2.28276
NK CD56	248	480	2569	3049	0.714	0.017256	0.028844	-0.447467	362	139	69	208	2.023	0.015678	0.005491	-1.10773	229	261	229	490	0.953	0.011995	0.010573	-0.17912
Tcell Cycling	253	156	206	362	3.903	0.012474	0.002425	-3.89921	2061	174	741	915	2.206	0.06928	0.023137	-0.500571	653	180	290	470	1.74	0.016312	0.009872	-0.424215
Cytotoxic T cell	675	1432	1426	2858	1.813	0.040484	0.018631	-0.527942	1400	805	377	1182	1.728	0.071223	0.024988	-0.85442	920	477	185	662	1.74	0.047996	0.016885	-0.90928
Treg	38	1022	969	1991	0.178	0.002882	0.01256	-2.11054	95	79	123	202	1.019	0.005705	0.005704	-0.000133	74	194	138	332	0.545	0.00379	0.006224	-0.84569
gdT	39	1767	3268	5035	0.073	0.001968	0.026623	-1.27338	209	262	216	478	0.969	0.00783	0.011487	-0.253106	427	356	150	506	1.37	0.012425	0.010335	-0.161565
dnT	38	84	40	124	2.226	0.001576	0.00059	-1.06608	27	5	16	21	1.792	0.001261	0.000574	-0.575201	31	12	10	22	1.75	0.000824	0.000355	-0.672809
MAIT	10	564	1945	2509	0.038	0.000546	0.019506	-1.40218	37	566	56	622	0.179	0.001976	0.011783	-0.425365	37	397	117	514	0.201	0.001926	0.011092	-0.417385
Bcell naive	726	1927	4362	6289	0.982	0.036695	0.053751	-0.485501	475	1538	1241	2779	0.465	0.020116	0.061341	-1.00748	327	1406	978	2384	0.361	0.014706	0.056027	-1.86278
Bcell CD21 Low	130	190	330	520	1.8976	0.00613967	0.0036183	-0.695545	86	172	175	347	0.632794	0.00361056	0.00698226	-0.79962	59	114	110	224	0.623858	0.00206981	0.0048506	-1.07973
Bcell US-mem	94	379	1624	2003	0.425309	0.00459508	0.0167365	-1.44331	62	183	480	663	0.272462	0.00247565	0.0152399	-1.3095	59	266	297	563	0.283845	0.00236209	0.0119909	-1.69119
Bcell S-mem	23	682	1196	1878	0.115	0.00121	0.013688	-2.77229	9	414	393	807	0.035	0.000401	0.016477	-2.69908	6	422	387	809	0.022	0.000182	0.016907	-3.04587
Plasma Bcells	0	88	94	182	0	0	0.001603	-1.17278	2	47	524	571	0.011	9.3e-05	0.013363	-0.496333	0	144	85	229	0	0	0.004532	-1.63172
Classical monocytes	2520	6502	5083	11585	1.695	0.170747	0.067621	-2.24828	1149	3946	1131	5077	0.588	0.088303	0.079655	-0.049841	4562	1919	4501	6420	1.243	0.251753	0.133537	-1.14176
Monocytes mito	141	923	432	1355	0.894	0.010915	0.010373	-0.018291	194	330	2283	2613	0.22	0.009014	0.069213	-0.72511	70	1970	2680	4650	0.044	0.003052	0.085277	-2.41042
Monocytes IFN	124	241	209	450	2.05	0.010615	0.00338	-1.30709	669	1583	1966	3549	0.505	0.054342	0.070051	-0.131406	132	484	914	1398	0.258	0.005248	0.035553	-0.770676
Monocytes IL1b	190	123	3403	3526	0.485	0.010529	0.033455	-1.14578	293	9	737	746	0.898	0.011552	0.029314	-0.177099	188	1255	321	1576	0.319	0.013345	0.038853	-0.227469
Intermediate monocytes	932	769	976	1745	3.303	0.082464	0.011442	-2.3592	803	698	804	1502	1.11	0.073831	0.035742	-0.488537	836	946	1426	2372	0.78	0.036618	0.048071	-0.356242
Non-classical monocytes	717	1503	3190	4693	1.257	0.049811	0.032919	-0.489308	462	412	211	623	1.357	0.031907	0.011649	-1.08931	845	720	1149	1869	0.932	0.050265	0.044106	-0.126838
cDCs	123	564	1997	2561	0.435	0.00766	0.019766	-1.15429	80	92	74	166	1.036	0.004136	0.004458	-0.05083	135	493	617	1110	0.324	0.004705	0.024515	-2.6987
ASDC	2	9	17	26	0.678	9.9e-05	0.000223	-0.300455	5	2	1	3	1.991	0.000346	8e-05	-1.24499	6	4	20	24	0.598	0.000149	0.000545	-0.48942
pDC	130	124	661	785	1.348	0.007985	0.005754	-0.402066	115	33	9	42	2.334	0.006273	0.000843	-2.46535	102	70	32	102	1.496	0.005059	0.002218	-1.45874
hSC	67	0	111	111	3.571	0.004179	0.001209	-2.73221	30	1	0	1	3.083	0.001699	1.1e-05	-5.48713	21	3	0	3	2.618	0.001303	8e-05	-2.38815
Platelets	29	160	285	445	0.58	0.001484	0.004478	-0.605148	97	127	587	714	0.381	0.004192	0.019057	-0.713003	70	29	30	59	1.624	0.002737	0.001563	-0.461137
Erythrocytes	1	12	63	75	0.125	0.000101	0.000912	-0.417036	2	12	5	17	0.335	0.000224	0.000262	-0.051585	3	0	1	1	2.244	0.000124	1.2e-05	-1.57821
filtered	28870	897	4287	5184					21437	634	759	1393					23809	761	732	1493
Total (unfiltered)	16362	47620	91261	138881					20452	23425	21284	44709					23436	22944	23750	46694
Total	45232	48517	95548	144065					41889	24059	22043	46102					47245	23705	24482	48187
