# Supplementary figures and images for: COVID-19 progression and convalescence in common variable immunodeficiency patients shows incomplete adaptive responses and persistent inflammasome activation
Source: Research Square preprint supplement (doi:10.21203/rs.3.rs-2246352/v1), 2022-11-14

Supp. Figure 3

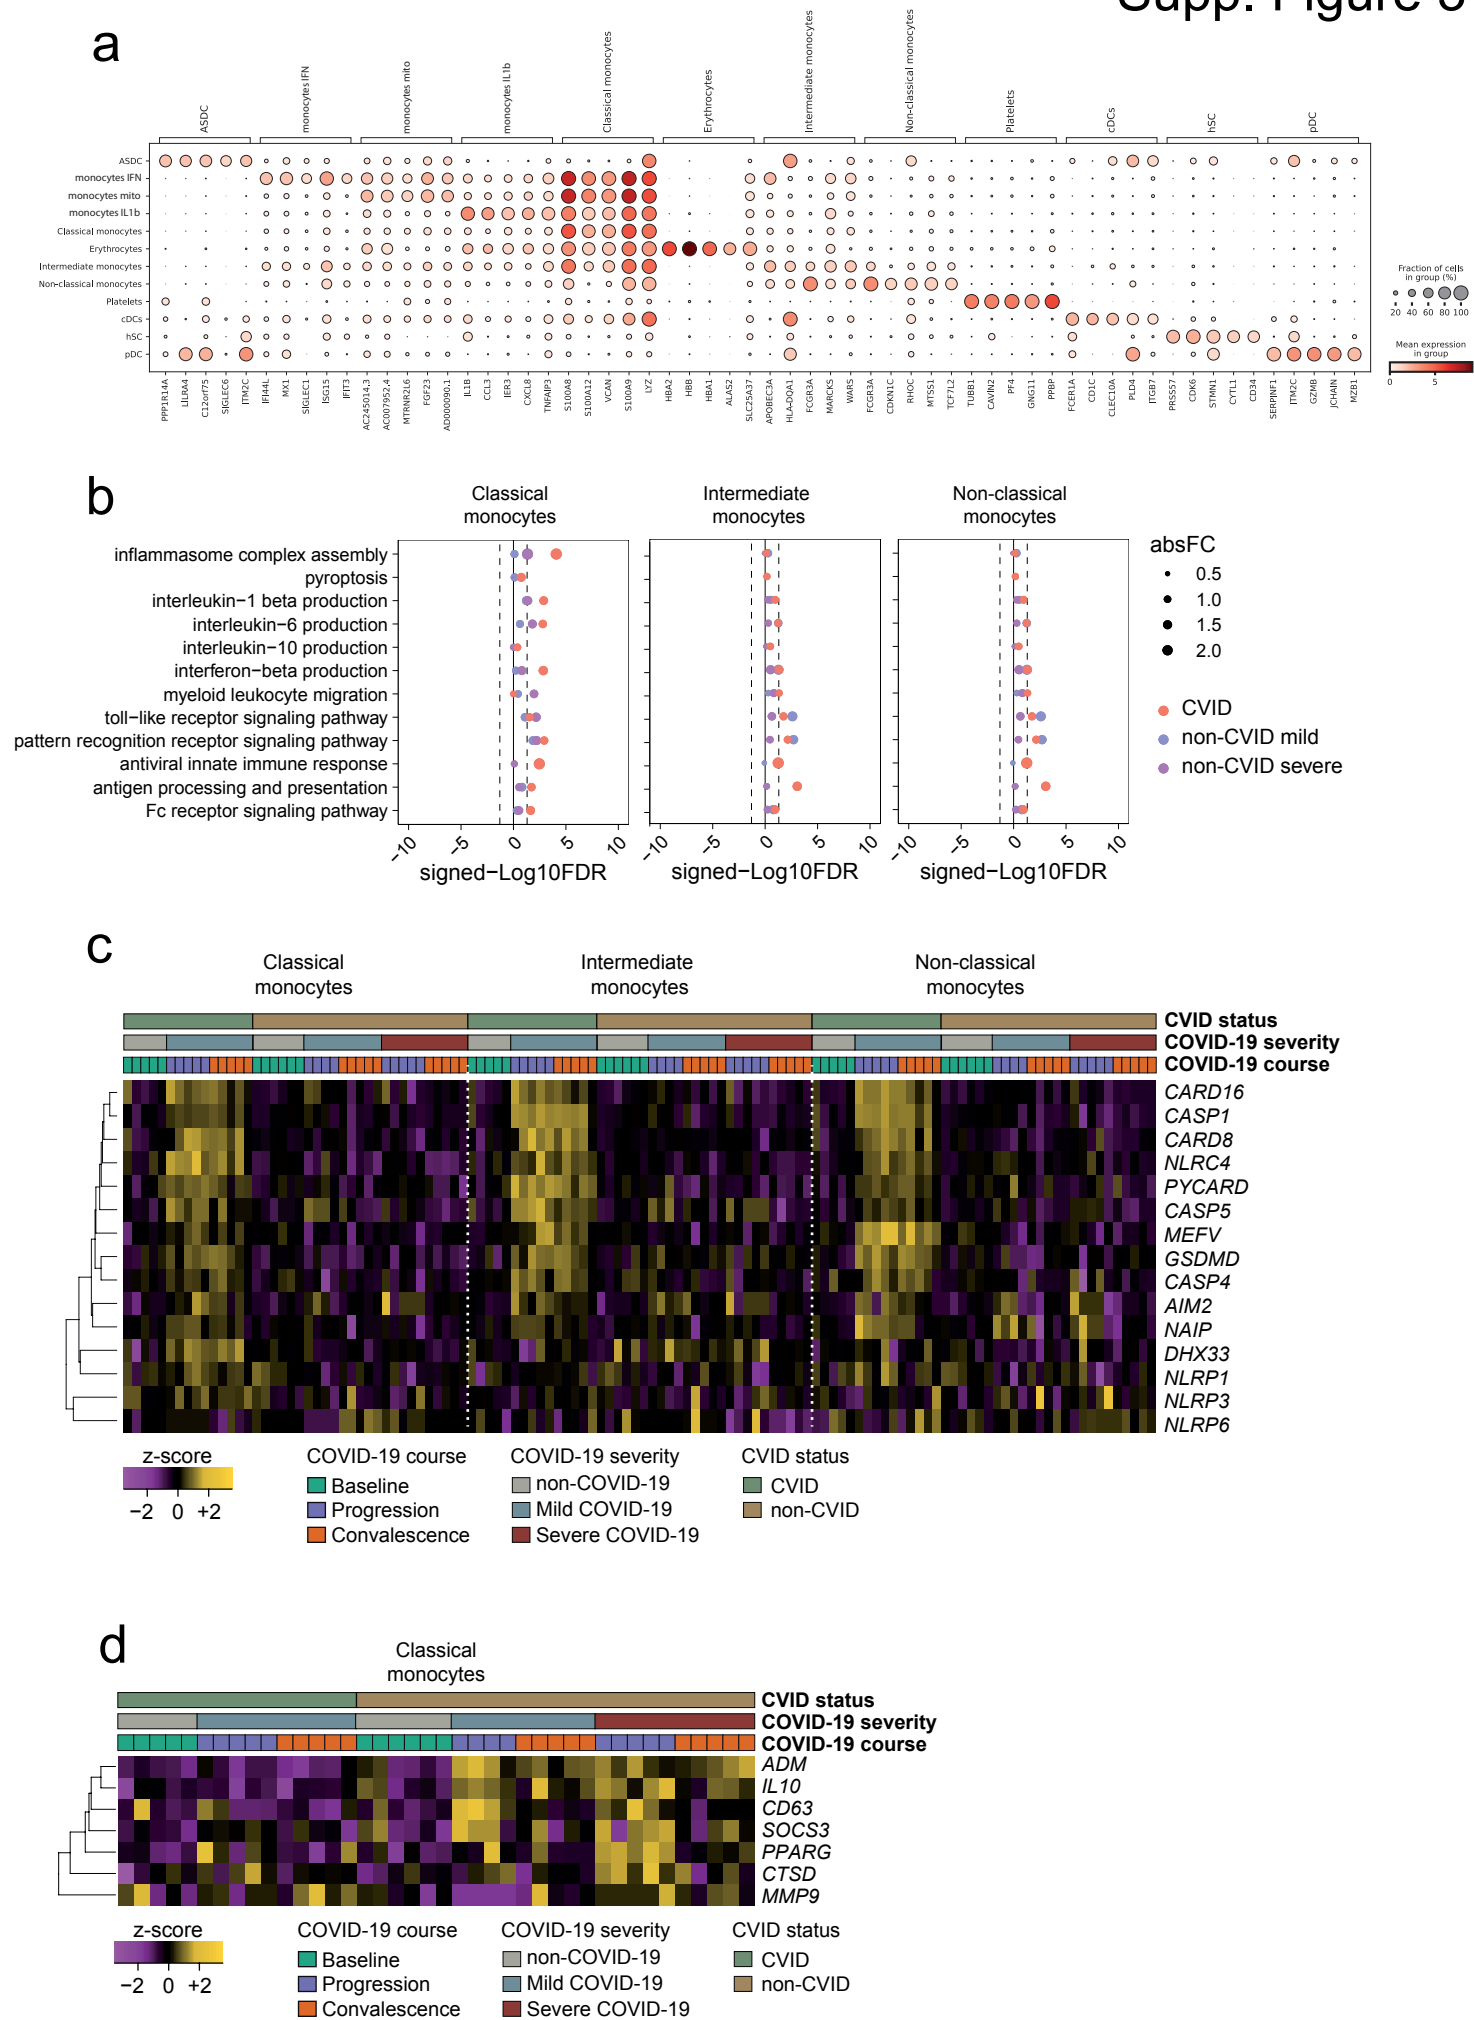

Supplement: Supplementary file 1 [file 18cd74e142aaab3615ff90ae.pdf]
